# Supplementary material
Source: publisher site journal article supplement (https://www.spandidos-publications.com/3996/downloadSupplementary)
Supplement: Supplementary file 1 [file downloadSupplementary]

## Sheet: 245 Grade2-3 STS
Table SI. The information of AMI patients and controls.
specimen number	category	gender	age	Emergency	Chest pain	ECG ST segment	Cardiac troponin T (μg/L)	collection
1	AMI	male	49	yes	yes	elevate	>0.5	whole blood
2	AMI	female	52	yes	yes	elevate	>0.5	whole blood
3	AMI	male	53	yes	yes	elevate	>0.5	whole blood
4	AMI	male	56	yes	yes	elevate	>0.5	whole blood
5	AMI	female	58	yes	yes	elevate	>0.5	whole blood
6	AMI	female	59	yes	yes	elevate	>0.5	whole blood
7	AMI	male	62	yes	yes	elevate	>0.5	whole blood
8	AMI	male	62	yes	yes	elevate	>0.5	whole blood
9	AMI	male	63	yes	yes	elevate	>0.5	whole blood
10	AMI	male	63	yes	yes	elevate	>0.5	whole blood
11	AMI	male	64	yes	yes	elevate	>0.5	whole blood
12	AMI	female	65	yes	yes	elevate	>0.5	whole blood
13	AMI	female	66	yes	yes	elevate	>0.5	whole blood
14	AMI	female	69	yes	yes	elevate	>0.5	whole blood
15	AMI	female	70	yes	yes	elevate	>0.5	whole blood
16	AMI	male	71	yes	yes	elevate	>0.5	whole blood
17	AMI	male	71	yes	yes	elevate	>0.5	whole blood
18	AMI	male	72	yes	yes	elevate	>0.5	whole blood
19	AMI	male	73	yes	yes	elevate	>0.5	whole blood
20	AMI	male	73	yes	yes	elevate	>0.5	whole blood
21	AMI	female	73	yes	yes	elevate	>0.5	whole blood
22	AMI	male	73	yes	yes	elevate	>0.5	whole blood
23	AMI	male	74	yes	yes	elevate	>0.5	whole blood
24	AMI	male	74	yes	yes	elevate	>0.5	whole blood
25	AMI	male	75	yes	yes	elevate	>0.5	whole blood
26	AMI	male	76	yes	yes	elevate	>0.5	whole blood
27	AMI	female	78	yes	yes	elevate	>0.5	whole blood
28	AMI	male	78	yes	yes	elevate	>0.5	whole blood
29	AMI	male	80	yes	yes	elevate	>0.5	whole blood
30	AMI	female	81	yes	yes	elevate	>0.5	whole blood
31	AMI	female	82	yes	yes	elevate	>0.5	whole blood
32	Control	male	46	no	no	normal	－	whole blood
33	Control	male	48	no	no	normal	－	whole blood
34	Control	female	49	no	no	normal	－	whole blood
35	Control	male	55	no	no	normal	－	whole blood
36	Control	female	58	no	no	normal	－	whole blood
37	Control	female	58	no	no	normal	－	whole blood
38	Control	male	58	no	no	normal	－	whole blood
39	Control	male	59	no	no	normal	－	whole blood
40	Control	female	60	no	no	normal	－	whole blood
41	Control	male	62	no	no	normal	－	whole blood
42	Control	female	63	no	no	normal	－	whole blood
43	Control	male	65	no	no	normal	－	whole blood
44	Control	male	66	no	no	normal	－	whole blood
45	Control	female	67	no	no	normal	－	whole blood
46	Control	male	68	no	no	normal	－	whole blood
47	Control	male	70	no	no	normal	－	whole blood
48	Control	female	71	no	no	normal	－	whole blood
49	Control	female	72	no	no	normal	－	whole blood
50	Control	female	73	no	no	normal	－	whole blood
51	Control	male	74	no	no	normal	－	whole blood
52	Control	female	74	no	no	normal	－	whole blood
53	Control	male	74	no	no	normal	－	whole blood
54	Control	male	76	no	no	normal	－	whole blood
55	Control	female	76	no	no	normal	－	whole blood
56	Control	male	76	no	no	normal	－	whole blood
57	Control	male	76	no	no	normal	－	whole blood
58	Control	female	78	no	no	normal	－	whole blood
59	Control	male	79	no	no	normal	－	whole blood
60	Control	female	81	no	no	normal	－	whole blood
61	Control	female	81	no	no	normal	－	whole blood
62	Control	male	83	no	no	normal	－	whole blood
